# Supplementary material for: A new cross-linking route via the unusual collision kinematics of hyperthermal protons in unsaturated hydrocarbons: the case of poly(trans-isoprene)
Source: Royal Society of Chemistry journal article supplement (doi:10.1039/b605705e), 2006-01-01
Supplement: b605705c.pdf [file b605705c.pdf]

## Supporting Information for

# A New Cross-linking Route via the Unusual Collision Kinematics of Hyperthermal Proton in Unsaturated Hydrocarbon: the Case of Poly(trans-isoprene)

Zhi Zheng,<sup>ac</sup> Wai Man Kwok<sup>b</sup> and Woon Ming Lau<sup>cd\*</sup>

<sup>a</sup>Institute of Surface Micro and Nano Materials, Xuchang University, Xuchang, 461000, China,

<sup>b</sup>Department of Chemistry, The Chinese University of Hong Kong, Shatin, Hong Kong, P.R. China

<sup>c</sup>Department of Physics, The Chinese University of Hong Kong, Shatin, Hong Kong, P.R. China.

<sup>d</sup>Surface Science Western, The University of Western Ontario, London, Ontario, Canada

*\*To whom correspondence should be addressed. Fax: 1-519-661-3709; Tel: 1-519-661-2173; E-mail llau22@uwo.ca*

**Figure S1.** Degree of crosslinking of the PtI film, expressed by the insoluble film thickness after the dissolution test of immersing the film in hexane for 5 minutes as a function of ion fluence for the proton-collision-induced method with 10eV H<sup>+</sup>

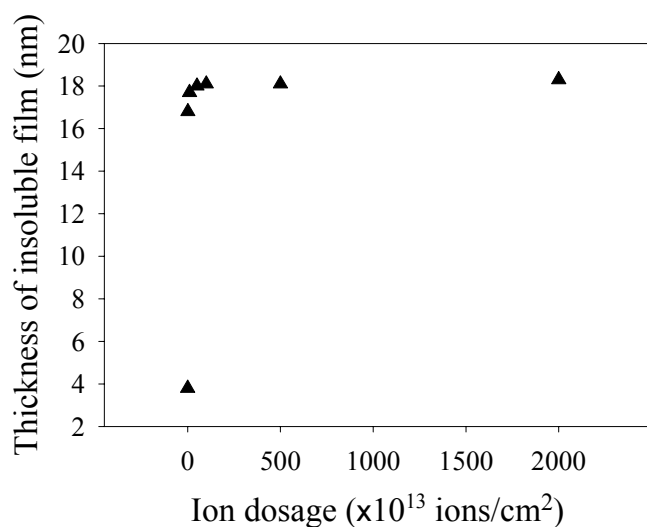

## Methods

Hyperthermal ion bombardment of the dotriacontane film was carried out in a mass- and-energy-selective low energy ion beam (LEIB) system. Briefly, H<sup>+</sup> projectile ions were produced and extracted from a H<sub>2</sub> plasma in a hot DC filament Colutron ion source. After mass and energy selection, H<sup>+</sup> ions with the desirable kinetic energy were impinged at normal incidence to the sample. The energy spread of the ion beam was about ±0.6 eV. The pressure of sample chamber during ion bombardment was 2×10<sup>-8</sup> Torr. The beam current was measured with a Faraday cup with a large entrance aperture (3mm diameter) and current density by a Faraday cup with a small entrance aperture. The current density was about 1μA/cm<sup>2</sup> for a beam at 10eV, which is equivalent to a projectile arrival rate of 6×10<sup>12</sup>/cm<sup>2</sup>s.

The film surface was mainly characterized by an XPS system having a Kratos AXIS-HS spectrometer equipped with a monochromatic Al K<sub>α</sub> source. The XPS chamber and LEIB system are linked together by ultrahigh vacuum connections so that samples can be analyzed, transferred and bombarded without air-exposure. *Ex-situ* AFM measurements were performed using a Nanoscope III AFM system.
